# Supplementary material for: Transmission of methicillin-resistant Staphylococcus aureus in long-term care facilities and their related healthcare networks
Source: PubMed Central journal article supplement (PMC5048656; doi:10.1186/s13073-016-0353-5), 2016-10-03
Supplement: 13073_2016_353_MOESM2_ESM.pdf [file 13073_2016_353_MOESM2_ESM.pdf]

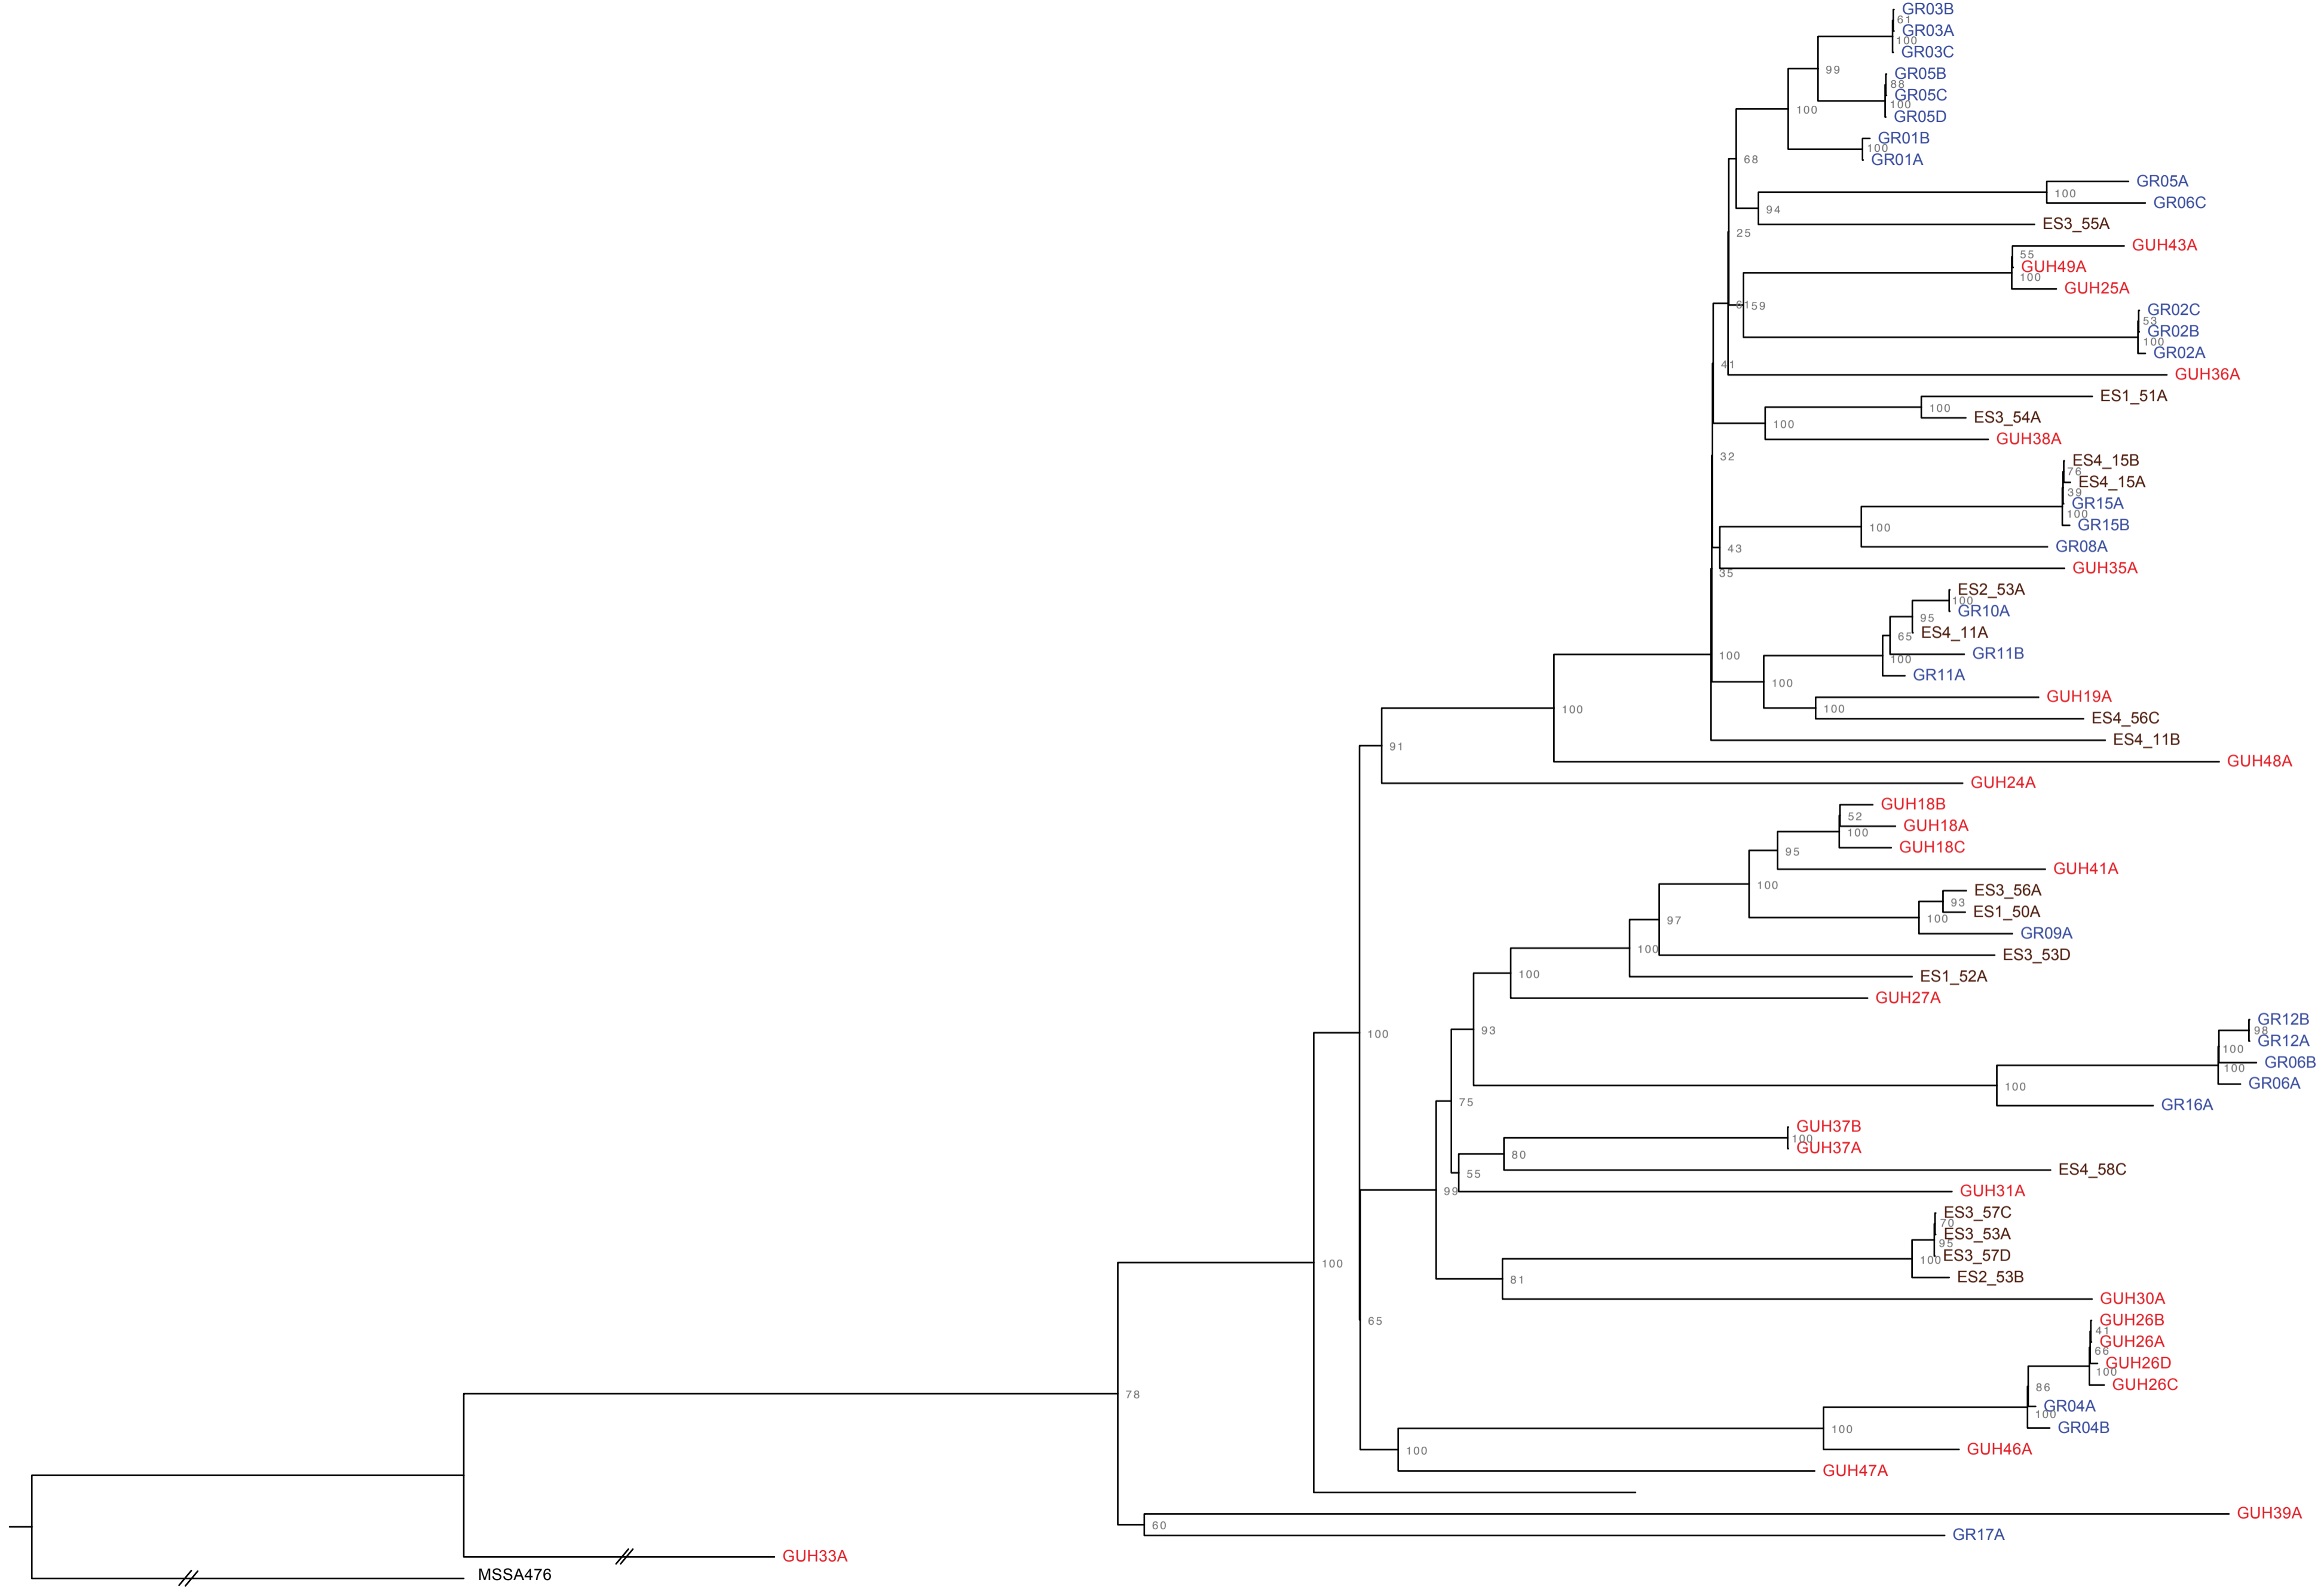

~38 SNPs
